# Supplementary material for: Insights into facile methane activation by a spin forbidden reaction with Ta+ ions in the gas phase
Source: Royal Society of Chemistry journal article supplement (doi:10.1039/d4sc08457h), 2025-01-01
Supplement: d4sc08457h1.pdf [file d4sc08457h1.pdf]

## Insights into Facile Methane Activation by a Spin Forbidden Reaction with Ta<sup>+</sup> Ions in the Gas Phase

Yang Liu,<sup>a</sup> Milan Ončák,<sup>b,\*</sup> Tucker W. R. Lewis,<sup>c</sup> Marcel Meta,<sup>d</sup> Shaun G. Ard,<sup>c</sup> Nicholas S.  
Shuman,<sup>c,\*</sup> Jennifer Meyer,<sup>d</sup> Albert A. Viggiano,<sup>c</sup> and Hua Guo<sup>a,\*</sup>

<sup>a</sup>*Department of Chemistry and Chemical Biology, Center for Computational Chemistry,  
University of New Mexico, Albuquerque, New Mexico 87131, United States*

<sup>b</sup>*Universität Innsbruck, Institut für Ionenphysik und Angewandte Physik, Technikerstraße 25,  
6020 Innsbruck, Austria*

<sup>c</sup>*Air Force Research Laboratory, Space Vehicles Directorate, Kirtland Air Force Base, New  
Mexico 87117, United States*

<sup>d</sup>*RPTU Kaiserslautern-Landau, Fachbereich Chemie und Forschungszentrum OPTIMAS, Erwin-  
Schrödinger Str. 52, 67663 Kaiserslautern, Germany*

### Supporting Information

\*: corresponding authors: Milan.Oncak@uibk.ac.at, nicholas.shuman.1@spaceforce.mil, hguo@unm.edu

Table S1. ZPE-corrected energies (eV) and vibrational harmonic frequencies (cm<sup>-1</sup>) of the stationary points along the reaction Ta<sup>+</sup> + CH<sub>4</sub> → TaCH<sub>2</sub><sup>+</sup> + H<sub>2</sub>

| Species                                           | Method             | <i>E</i> | Frequencies |      |      |      |      |      |      |      |      |      |      |      |
|---------------------------------------------------|--------------------|----------|-------------|------|------|------|------|------|------|------|------|------|------|------|
|                                                   |                    |          | 1           | 2    | 3    | 4    | 5    | 6    | 7    | 8    | 9    | 10   | 11   | 12   |
| <sup>5</sup> Ta <sup>+</sup> +<br>CH <sub>4</sub> | PES <sup>a</sup>   | 0        | 1308        | 1308 | 1308 | 1529 | 1529 | 3037 | 3143 | 3143 | 3143 |      |      |      |
|                                                   | DFT <sup>b</sup>   | 0        | 1303        | 1303 | 1303 | 1522 | 1522 | 3028 | 3144 | 3144 | 3144 |      |      |      |
|                                                   | DFT <sup>c</sup>   | 0        |             |      |      |      |      |      |      |      |      |      |      |      |
|                                                   | CC <sup>d</sup>    | 0        |             |      |      |      |      |      |      |      |      |      |      |      |
|                                                   | Expt. <sup>e</sup> | 0        |             |      |      |      |      |      |      |      |      |      |      |      |
| <sup>3</sup> Ta <sup>+</sup> +<br>CH <sub>4</sub> | PES <sup>a</sup>   | 0.404    | 1308        | 1308 | 1308 | 1540 | 1540 | 3018 | 3230 | 3230 | 3230 |      |      |      |
|                                                   | DFT <sup>b</sup>   | 0.387    | 1303        | 1303 | 1303 | 1522 | 1522 | 3028 | 3144 | 3144 | 3144 |      |      |      |
|                                                   | DFT <sup>c</sup>   | 0.402    |             |      |      |      |      |      |      |      |      |      |      |      |
|                                                   | CC <sup>d</sup>    | 0.393    |             |      |      |      |      |      |      |      |      |      |      |      |
|                                                   | Expt. <sup>e</sup> | 0.428    |             |      |      |      |      |      |      |      |      |      |      |      |
| <sup>1</sup> Ta <sup>+</sup> +<br>CH <sub>4</sub> | PES <sup>a</sup>   | 0.593    | 1303        | 1303 | 1303 | 1513 | 1513 | 3077 | 3103 | 3103 | 3103 |      |      |      |
|                                                   | DFT <sup>b</sup>   | 0.584    | 1303        | 1303 | 1303 | 1522 | 1522 | 3028 | 3144 | 3144 | 3144 |      |      |      |
|                                                   | DFT <sup>c</sup>   | 1.900    |             |      |      |      |      |      |      |      |      |      |      |      |
|                                                   | CC <sup>d</sup>    | 1.328    |             |      |      |      |      |      |      |      |      |      |      |      |
|                                                   | Expt. <sup>e</sup> | 1.216    |             |      |      |      |      |      |      |      |      |      |      |      |
| <sup>5</sup> INT1                                 | PES <sup>a</sup>   | -0.634   | 144         | 209  | 238  | 1147 | 1313 | 1344 | 1451 | 1507 | 2838 | 2885 | 3110 | 3199 |
|                                                   | DFT <sup>b</sup>   | -0.611   | 71          | 209  | 491  | 1156 | 1289 | 1374 | 1454 | 1561 | 2670 | 3016 | 3107 | 3173 |
|                                                   | DFT <sup>c</sup>   | -0.561   |             |      |      |      |      |      |      |      |      |      |      |      |
|                                                   | CC <sup>d</sup>    | -0.691   |             |      |      |      |      |      |      |      |      |      |      |      |
| <sup>3</sup> INT1                                 | PES <sup>a</sup>   | -0.322   | 173         | 233  | 640  | 1046 | 1354 | 1397 | 1428 | 1521 | 2499 | 2625 | 3043 | 3129 |
|                                                   | DFT <sup>b</sup>   | -0.333   | 209         | 277  | 673  | 1094 | 1335 | 1341 | 1485 | 1552 | 2482 | 2671 | 3073 | 3149 |
|                                                   | DFT <sup>c</sup>   | -0.232   |             |      |      |      |      |      |      |      |      |      |      |      |
|                                                   | CC <sup>d</sup>    | -0.417   |             |      |      |      |      |      |      |      |      |      |      |      |
| <sup>1</sup> INT1                                 | PES <sup>a</sup>   | -0.098   | 96          | 174  | 423  | 1045 | 1277 | 1398 | 1423 | 1523 | 2523 | 2636 | 2975 | 3062 |
|                                                   | DFT <sup>b</sup>   | -0.118   | 140         | 164  | 599  | 1103 | 1322 | 1362 | 1447 | 1571 | 2542 | 2804 | 3080 | 3158 |
|                                                   | DFT <sup>c</sup>   | 0.840    |             |      |      |      |      |      |      |      |      |      |      |      |
|                                                   | CC <sup>d</sup>    | -0.176   |             |      |      |      |      |      |      |      |      |      |      |      |
| <sup>5</sup> INT2                                 | PES <sup>a</sup>   | 0.743    | 133         | 153  | 269  | 380  | 449  | 966  | 1326 | 1343 | 1768 | 3004 | 3150 | 3170 |
|                                                   | DFT <sup>b</sup>   | 0.530    | 177         | 224  | 281  | 331  | 425  | 913  | 1323 | 1349 | 1620 | 2973 | 3127 | 3173 |
|                                                   | DFT <sup>c</sup>   | 0.631    |             |      |      |      |      |      |      |      |      |      |      |      |
|                                                   | CC <sup>d</sup>    | 0.642    |             |      |      |      |      |      |      |      |      |      |      |      |
| <sup>3</sup> INT2                                 | PES <sup>a</sup>   | -1.805   | 251         | 366  | 349  | 521  | 621  | 1147 | 1318 | 1344 | 1890 | 2887 | 2998 | 3040 |
|                                                   | DFT <sup>b</sup>   | -1.802   | 260         | 261  | 340  | 554  | 612  | 1152 | 1314 | 1321 | 1951 | 2938 | 3028 | 3054 |
|                                                   | DFT <sup>c</sup>   | -1.637   |             |      |      |      |      |      |      |      |      |      |      |      |
|                                                   | CC <sup>d</sup>    | -1.736   |             |      |      |      |      |      |      |      |      |      |      |      |
| <sup>1</sup> INT2                                 | PES <sup>a</sup>   | -1.619   | 288         | 299  | 379  | 527  | 645  | 1152 | 1317 | 1373 | 1929 | 2887 | 2968 | 3013 |
|                                                   | DFT <sup>b</sup>   | -1.612   | 262         | 271  | 321  | 536  | 639  | 1153 | 1304 | 1328 | 1964 | 2913 | 2992 | 3084 |
|                                                   | DFT <sup>c</sup>   | -1.440   |             |      |      |      |      |      |      |      |      |      |      |      |
|                                                   | CC <sup>d</sup>    | -1.540   |             |      |      |      |      |      |      |      |      |      |      |      |
| <sup>5</sup> INT3                                 | PES <sup>a</sup>   | 1.829    | 124         | 168  | 393  | 462  | 530  | 635  | 662  | 809  | 1375 | 1661 | 3072 | 3082 |
|                                                   | DFT <sup>b</sup>   | 1.826    | 101         | 172  | 405  | 584  | 629  | 658  | 723  | 991  | 1298 | 1509 | 3053 | 3155 |
|                                                   | DFT <sup>c</sup>   | 2.037    |             |      |      |      |      |      |      |      |      |      |      |      |
|                                                   | CC <sup>d</sup>    | 2.083    |             |      |      |      |      |      |      |      |      |      |      |      |
| <sup>3</sup> INT3                                 | PES <sup>a</sup>   | -0.738   | 125         | 350  | 385  | 594  | 673  | 716  | 806  | 1323 | 1946 | 2008 | 3036 | 3141 |
|                                                   | DFT <sup>b</sup>   | -0.731   | 151         | 311  | 325  | 597  | 647  | 727  | 808  | 1311 | 1949 | 1956 | 3041 | 3141 |

|                   |                  |        |               |              |     |      |      |      |      |      |      |      |      |      |
|-------------------|------------------|--------|---------------|--------------|-----|------|------|------|------|------|------|------|------|------|
|                   |                  |        | -0.488        |              |     |      |      |      |      |      |      |      |      |      |
|                   | CC <sup>d</sup>  |        | -0.595        |              |     |      |      |      |      |      |      |      |      |      |
| <sup>1</sup> INT3 | PES <sup>a</sup> | -1.678 | 214           | 492          | 543 | 713  | 720  | 782  | 946  | 1314 | 1922 | 1939 | 2547 | 3157 |
|                   | DFT <sup>b</sup> | -1.665 | 283           | 538          | 562 | 659  | 733  | 763  | 894  | 1341 | 1957 | 1973 | 2629 | 3213 |
|                   | DFT <sup>c</sup> | 1.420  |               |              |     |      |      |      |      |      |      |      |      |      |
|                   | CC <sup>d</sup>  | -1.823 |               |              |     |      |      |      |      |      |      |      |      |      |
| <sup>5</sup> INT4 | PES <sup>a</sup> | 0.269  | 197           | 331          | 394 | 556  | 633  | 782  | 913  | 1357 | 1422 | 3009 | 3099 | 3479 |
|                   | DFT <sup>b</sup> | 0.246  | 164           | 242          | 405 | 499  | 637  | 730  | 871  | 1310 | 1339 | 3038 | 3149 | 3413 |
|                   | DFT <sup>c</sup> | 0.401  |               |              |     |      |      |      |      |      |      |      |      |      |
|                   | CC <sup>d</sup>  | 0.293  |               |              |     |      |      |      |      |      |      |      |      |      |
| <sup>3</sup> INT4 | PES <sup>a</sup> | -0.511 | <i>i</i> 160  | 319          | 412 | 685  | 825  | 869  | 996  | 1325 | 1595 | 2774 | 3517 | 3937 |
|                   | DFT <sup>b</sup> | -0.571 | 228           | 309          | 398 | 565  | 655  | 734  | 863  | 1079 | 1358 | 2631 | 3218 | 3806 |
|                   | CC <sup>d</sup>  | -0.686 |               |              |     |      |      |      |      |      |      |      |      |      |
| <sup>3</sup> INT5 | PES <sup>a</sup> | -0.859 | 180           | 408          | 460 | 733  | 750  | 810  | 1085 | 1288 | 1704 | 2781 | 3002 | 3163 |
|                   | DFT <sup>b</sup> | -0.861 | 188           | 318          | 519 | 702  | 735  | 837  | 1068 | 1272 | 1686 | 2748 | 3041 | 3138 |
|                   | DFT <sup>c</sup> | -0.688 |               |              |     |      |      |      |      |      |      |      |      |      |
|                   | CC <sup>d</sup>  | -0.901 |               |              |     |      |      |      |      |      |      |      |      |      |
| <sup>1</sup> INT4 | PES <sup>a</sup> | -0.576 | 353           | 409          | 436 | 501  | 719  | 740  | 851  | 1339 | 1498 | 2622 | 3047 | 3241 |
|                   | DFT <sup>b</sup> | -0.609 | 236           | 360          | 521 | 645  | 789  | 818  | 985  | 1301 | 1570 | 2725 | 3092 | 3213 |
|                   | CC <sup>d</sup>  | -0.748 |               |              |     |      |      |      |      |      |      |      |      |      |
| <sup>1</sup> INT5 | PES <sup>a</sup> | -0.605 | 167           | 389          | 588 | 728  | 833  | 871  | 1034 | 1281 | 1727 | 2739 | 3070 | 3157 |
|                   | DFT <sup>b</sup> | -0.614 | 174           | 321          | 546 | 736  | 738  | 843  | 1044 | 1269 | 1672 | 2777 | 3042 | 3140 |
|                   | DFT <sup>c</sup> | 0.168  |               |              |     |      |      |      |      |      |      |      |      |      |
|                   | CC <sup>d</sup>  | -0.660 |               |              |     |      |      |      |      |      |      |      |      |      |
| <sup>5</sup> SP1  | PES <sup>a</sup> | 0.735  | <i>i</i> 221  | <i>i</i> 111 | 227 | 383  | 424  | 1046 | 1362 | 1369 | 1935 | 3098 | 3246 | 3287 |
|                   | DFT <sup>b</sup> | 0.732  | <i>i</i> 315  | 71           | 251 | 338  | 359  | 1016 | 1363 | 1376 | 1879 | 3041 | 3222 | 3237 |
|                   | DFT <sup>c</sup> | 0.832  |               |              |     |      |      |      |      |      |      |      |      |      |
|                   | CC <sup>d</sup>  | 0.779  |               |              |     |      |      |      |      |      |      |      |      |      |
| <sup>3</sup> SP1  | PES <sup>a</sup> | -0.362 | <i>i</i> 787  | 366          | 420 | 912  | 1065 | 1246 | 1319 | 1389 | 1693 | 1886 | 3091 | 3171 |
|                   | DFT <sup>b</sup> | -0.370 | <i>i</i> 848  | 381          | 508 | 917  | 1020 | 1181 | 1366 | 1411 | 1747 | 1841 | 3043 | 3114 |
|                   | DFT <sup>c</sup> | -0.190 |               |              |     |      |      |      |      |      |      |      |      |      |
|                   | CC <sup>d</sup>  | -0.454 |               |              |     |      |      |      |      |      |      |      |      |      |
| <sup>1</sup> SP1  | PES <sup>a</sup> | -0.164 | <i>i</i> 627  | 273          | 381 | 1018 | 1066 | 1264 | 1285 | 1391 | 1638 | 1802 | 3048 | 3188 |
|                   | DFT <sup>b</sup> | -0.161 | <i>i</i> 692  | 346          | 425 | 954  | 1067 | 1219 | 1353 | 1389 | 1728 | 1827 | 3044 | 3116 |
|                   | DFT <sup>c</sup> | 1.361  |               |              |     |      |      |      |      |      |      |      |      |      |
|                   | CC <sup>d</sup>  | -0.221 |               |              |     |      |      |      |      |      |      |      |      |      |
| <sup>5</sup> SP2  | PES <sup>a</sup> | 2.093  | <i>i</i> 834  | 98           | 168 | 326  | 652  | 677  | 732  | 840  | 1319 | 1688 | 3017 | 3212 |
|                   | DFT <sup>b</sup> | 2.090  | <i>i</i> 854  | 345          | 351 | 443  | 539  | 626  | 698  | 849  | 1289 | 1673 | 3054 | 3154 |
|                   | DFT <sup>c</sup> | 2.300  |               |              |     |      |      |      |      |      |      |      |      |      |
|                   | CC <sup>d</sup>  | 2.128  |               |              |     |      |      |      |      |      |      |      |      |      |
| <sup>3</sup> SP2  | PES <sup>a</sup> | -0.601 | <i>i</i> 482  | 313          | 341 | 474  | 686  | 747  | 823  | 1299 | 1903 | 1959 | 3021 | 3178 |
|                   | DFT <sup>b</sup> | -0.597 | <i>i</i> 497  | 304          | 387 | 452  | 666  | 691  | 803  | 1299 | 1871 | 1942 | 3046 | 3150 |
|                   | DFT <sup>c</sup> | -0.227 |               |              |     |      |      |      |      |      |      |      |      |      |
|                   | CC <sup>d</sup>  | -0.481 |               |              |     |      |      |      |      |      |      |      |      |      |
| <sup>1</sup> SP2  | PES <sup>a</sup> | -0.872 | <i>i</i> 759  | 366          | 632 | 705  | 739  | 847  | 1262 | 1344 | 1823 | 1991 | 1998 | 3171 |
|                   | DFT <sup>b</sup> | -0.863 | <i>i</i> 1018 | 410          | 672 | 725  | 740  | 852  | 1332 | 1367 | 1861 | 1968 | 1980 | 3219 |
|                   | DFT <sup>c</sup> | -0.614 |               |              |     |      |      |      |      |      |      |      |      |      |
|                   | CC <sup>d</sup>  | -1.064 |               |              |     |      |      |      |      |      |      |      |      |      |
| <sup>5</sup> SP3  | PES <sup>a</sup> | 2.009  | <i>i</i> 111  | 75           | 233 | 396  | 500  | 536  | 670  | 812  | 1298 | 1906 | 3064 | 3168 |

|                                                                 |                    |                |               |              |     |      |      |      |      |      |      |      |      |      |
|-----------------------------------------------------------------|--------------------|----------------|---------------|--------------|-----|------|------|------|------|------|------|------|------|------|
|                                                                 | DFT <sup>b</sup>   | 1.996          | <i>i</i> 163  | 138          | 298 | 298  | 441  | 515  | 663  | 735  | 1256 | 1919 | 3042 | 3166 |
|                                                                 | DFT <sup>c</sup>   | 2.224          |               |              |     |      |      |      |      |      |      |      |      |      |
|                                                                 | CC <sup>d</sup>    | 2.162          |               |              |     |      |      |      |      |      |      |      |      |      |
| <sup>3</sup> SP3                                                | PES <sup>a</sup>   | 0.141          | <i>i</i> 1052 | <i>i</i> 292 | 415 | 563  | 599  | 710  | 892  | 1440 | 1772 | 1925 | 3025 | 3180 |
|                                                                 | DFT <sup>b</sup>   | 0.145          | <i>i</i> 1188 | 344          | 374 | 493  | 535  | 670  | 817  | 1324 | 1840 | 1895 | 2993 | 3152 |
|                                                                 | DFT <sup>c</sup>   | 0.027          |               |              |     |      |      |      |      |      |      |      |      |      |
|                                                                 | CC <sup>d</sup>    | 0.323          |               |              |     |      |      |      |      |      |      |      |      |      |
| <sup>1</sup> SP3                                                | PES <sup>a</sup>   | -0.542         | <i>i</i> 846  | 313          | 533 | 586  | 702  | 810  | 843  | 1335 | 1849 | 2084 | 2642 | 3298 |
|                                                                 | DFT <sup>b</sup>   | -0.563         | <i>i</i> 1024 | 358          | 523 | 539  | 715  | 819  | 870  | 1334 | 1809 | 2007 | 2613 | 3217 |
|                                                                 | DFT <sup>c</sup>   | 0.329          |               |              |     |      |      |      |      |      |      |      |      |      |
|                                                                 | CC <sup>d</sup>    | -0.701         |               |              |     |      |      |      |      |      |      |      |      |      |
| <sup>5</sup> SP4                                                | PES <sup>a</sup>   | 1.216          | <i>i</i> 685  | 205          | 420 | 444  | 974  | 987  | 1216 | 1371 | 1523 | 1790 | 3038 | 3089 |
|                                                                 | DFT <sup>b</sup>   | 1.214          | <i>i</i> 770  | 135          | 414 | 513  | 947  | 1037 | 1190 | 1343 | 1545 | 1789 | 3066 | 3173 |
|                                                                 | DFT <sup>c</sup>   | 1.431          |               |              |     |      |      |      |      |      |      |      |      |      |
|                                                                 | CC <sup>d</sup>    | 1.233          |               |              |     |      |      |      |      |      |      |      |      |      |
| <sup>3</sup> SP4                                                | PES <sup>a</sup>   | -0.888         | <i>i</i> 573  | 240          | 562 | 734  | 846  | 922  | 1040 | 1289 | 1869 | 2099 | 3003 | 3148 |
|                                                                 | DFT <sup>b</sup>   | -0.884         | <i>i</i> 507  | 246          | 569 | 737  | 859  | 904  | 1049 | 1282 | 1865 | 2046 | 3042 | 3138 |
|                                                                 | DFT <sup>c</sup>   | -0.686         |               |              |     |      |      |      |      |      |      |      |      |      |
|                                                                 | CC <sup>d</sup>    | -0.940         |               |              |     |      |      |      |      |      |      |      |      |      |
| <sup>1</sup> SP4                                                | PES <sup>a</sup>   | -0.632         | <i>i</i> 607  | 231          | 646 | 724  | 896  | 993  | 1034 | 1292 | 1933 | 1974 | 3057 | 3141 |
|                                                                 | DFT <sup>b</sup>   | -0.637         | <i>i</i> 528  | 239          | 598 | 740  | 863  | 939  | 1035 | 1279 | 1867 | 2031 | 3041 | 3137 |
|                                                                 | DFT <sup>c</sup>   | 0.223          |               |              |     |      |      |      |      |      |      |      |      |      |
|                                                                 | CC <sup>d</sup>    | -0.701         |               |              |     |      |      |      |      |      |      |      |      |      |
| <sup>5</sup> TaCH <sub>2</sub> <sup>+</sup><br>+ H <sub>2</sub> | PES <sup>a</sup>   | 0.764          | 398           | 642          | 701 | 1295 | 3104 | 3188 |      | 4360 |      |      |      |      |
|                                                                 | DFT <sup>b</sup>   | 0.773          | 441           | 634          | 723 | 1306 | 3050 | 3129 |      | 4356 |      |      |      |      |
|                                                                 | DFT <sup>c</sup>   | 0.854          |               |              |     |      |      |      |      |      |      |      |      |      |
|                                                                 | CC <sup>d</sup>    | 0.819          |               |              |     |      |      |      |      |      |      |      |      |      |
| <sup>3</sup> TaCH <sub>2</sub> <sup>+</sup><br>+ H <sub>2</sub> | PES <sup>a</sup>   | -0.204         | 475           | 707          | 872 | 1327 | 2688 | 3219 |      | 4439 |      |      |      |      |
|                                                                 | DFT <sup>b</sup>   | -0.177         | 569           | 701          | 883 | 1345 | 2576 | 3215 |      | 4356 |      |      |      |      |
|                                                                 | DFT <sup>c</sup>   | 0.253          |               |              |     |      |      |      |      |      |      |      |      |      |
|                                                                 | CC <sup>d</sup>    | -0.297         |               |              |     |      |      |      |      |      |      |      |      |      |
|                                                                 | Expt. <sup>f</sup> | -0.10<br>±0.02 |               |              |     |      |      |      |      |      |      |      |      |      |
| <sup>1</sup> TaCH <sub>2</sub> <sup>+</sup><br>+ H <sub>2</sub> | PES <sup>a</sup>   | -0.171         | 531           | 729          | 902 | 1380 | 2537 | 3226 |      | 4403 |      |      |      |      |
|                                                                 | DFT <sup>b</sup>   | -0.162         | 562           | 723          | 896 | 1355 | 2571 | 3212 |      | 4356 |      |      |      |      |
|                                                                 | CC <sup>d</sup>    | -0.302         |               |              |     |      |      |      |      |      |      |      |      |      |
| <sup>5</sup> HTaCH <sup>+</sup><br>+ H <sub>2</sub>             | PES <sup>a</sup>   | 1.869          | 496           | 542          | 599 | 751  | 1961 | 3162 |      | 4360 |      |      |      |      |
|                                                                 | DFT <sup>b</sup>   | 1.941          | 389           | 506          | 507 | 731  | 1943 | 3172 |      | 4356 |      |      |      |      |
|                                                                 | CC <sup>d</sup>    | 1.990          |               |              |     |      |      |      |      |      |      |      |      |      |
| <sup>3</sup> HTaCH <sup>+</sup><br>+ H <sub>2</sub>             | PES <sup>a</sup>   | 0.860          | 495           | 634          | 656 | 913  | 2040 | 3272 |      | 4439 |      |      |      |      |
|                                                                 | DFT <sup>b</sup>   | 0.864          | 595           | 685          | 707 | 909  | 1962 | 3188 |      | 4356 |      |      |      |      |
|                                                                 | DFT <sup>c</sup>   | 0.969          |               |              |     |      |      |      |      |      |      |      |      |      |
|                                                                 | CC <sup>d</sup>    | 0.793          |               |              |     |      |      |      |      |      |      |      |      |      |
| <sup>1</sup> HTaCH <sup>+</sup><br>+ H <sub>2</sub>             | PES <sup>a</sup>   | 0.282          | 621           | 770          | 799 | 1069 | 1963 | 3180 |      | 4403 |      |      |      |      |
|                                                                 | DFT <sup>b</sup>   | 0.284          | 567           | 752          | 757 | 1020 | 1931 | 3188 |      | 4356 |      |      |      |      |
|                                                                 | DFT <sup>c</sup>   | 0.398          |               |              |     |      |      |      |      |      |      |      |      |      |
|                                                                 | CC <sup>d</sup>    | 0.017          |               |              |     |      |      |      |      |      |      |      |      |      |

<sup>a</sup> This work, PES. <sup>b</sup> This work, B3LYP/DZ. <sup>c</sup> B3LYP/HW+/6-311++G(3df,3p).<sup>1</sup> <sup>d</sup> CCSD(T)//B3LYP.<sup>2</sup> <sup>e</sup> Experimental values.<sup>3</sup> <sup>f</sup> Experimental exothermicity.<sup>1</sup>

Figure S1. Comparison of geometries in internal coordinates (distances in Å and angles in degrees) for the stationary points on the quintet state. The values correspond to PIP-NN PES, B3LYP/DZ, and B3LYP/HW+/6-311++G(3df,3p)<sup>1</sup> from top to bottom.

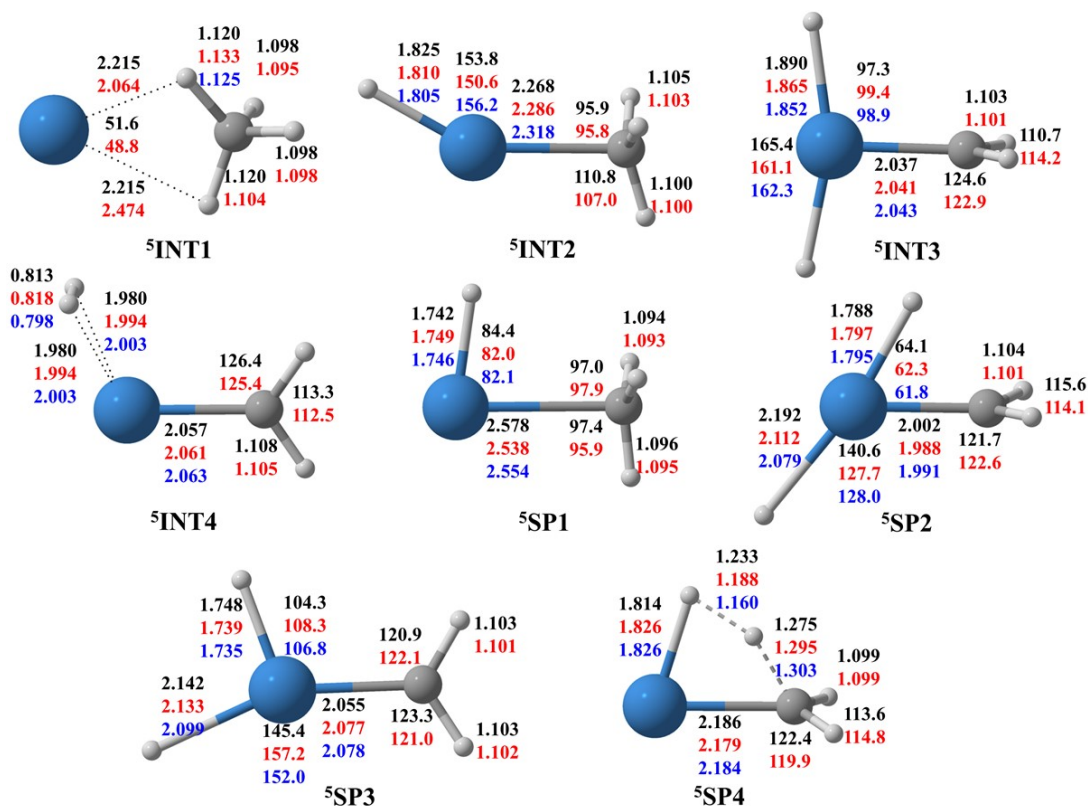

Figure S2. Similar to Figure S1 but for the triplet state.

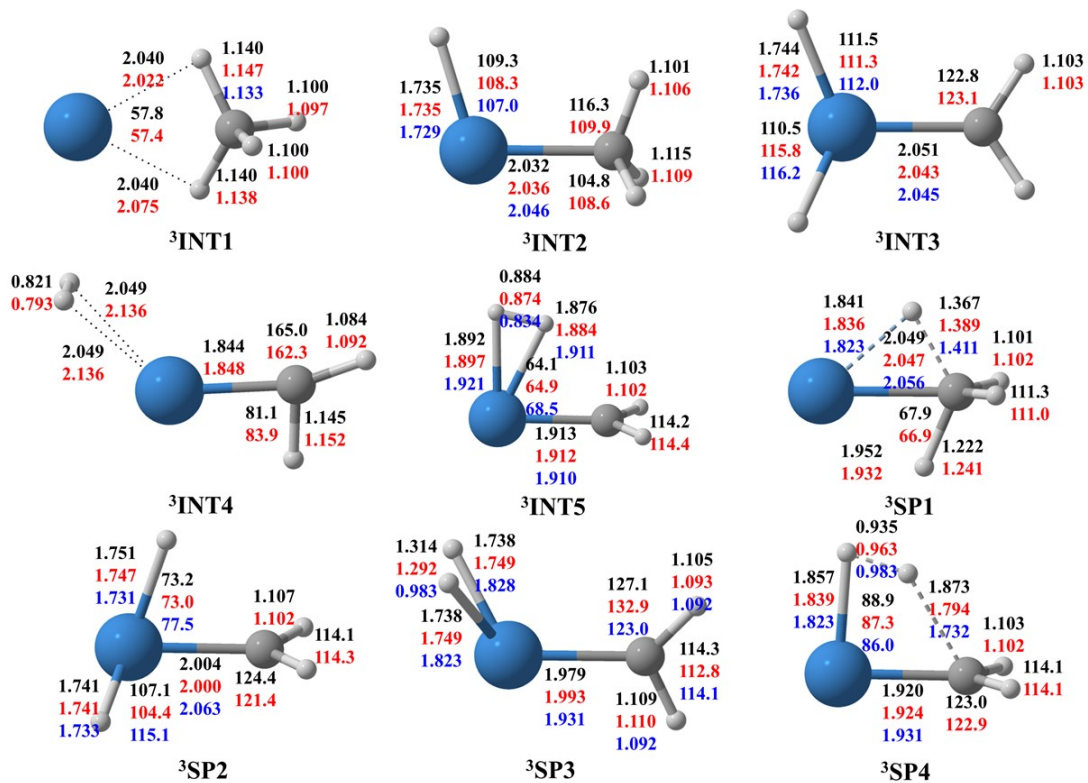

Figure S3. Similar to Figure S1 but for the singlet state.

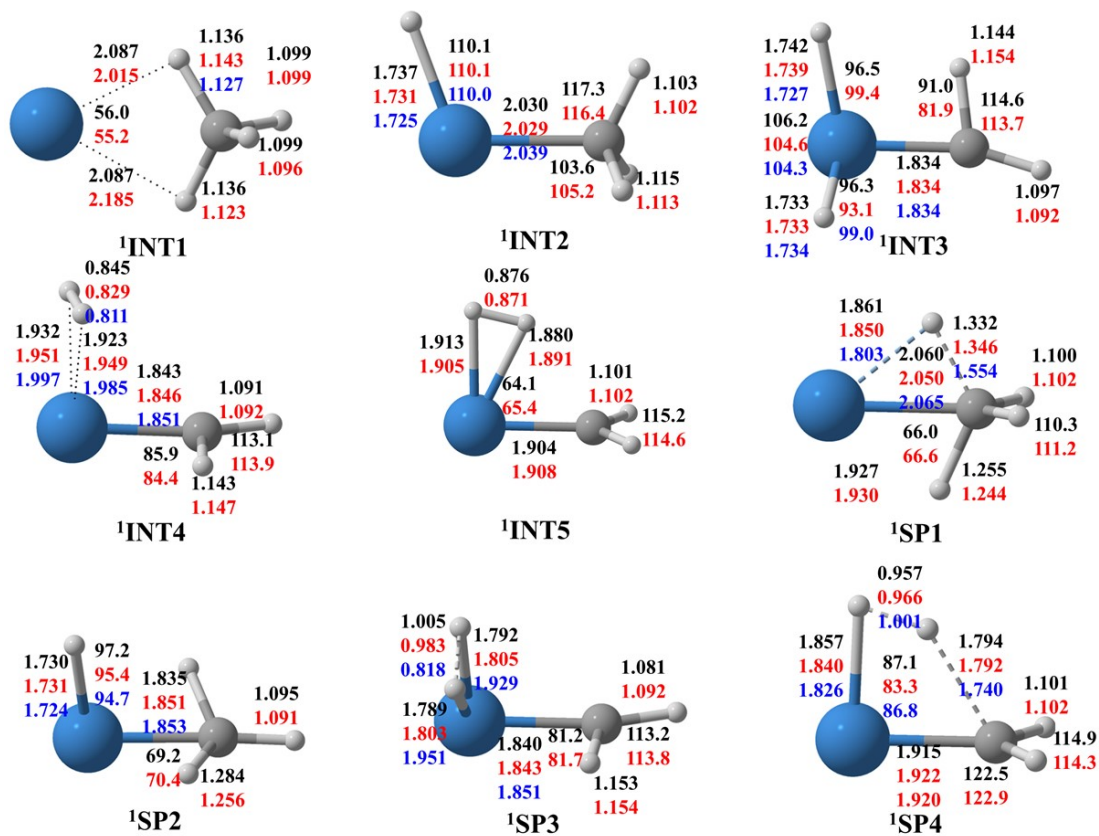

Figure S4. (a) Fitting error ( $E_{\text{fit}} - E_{\text{target}}$ , in eV) of the quintet, triplet, and singlet PESs as a function of the DFT energy (eV). (b) Distributions of the absolute fitting errors.

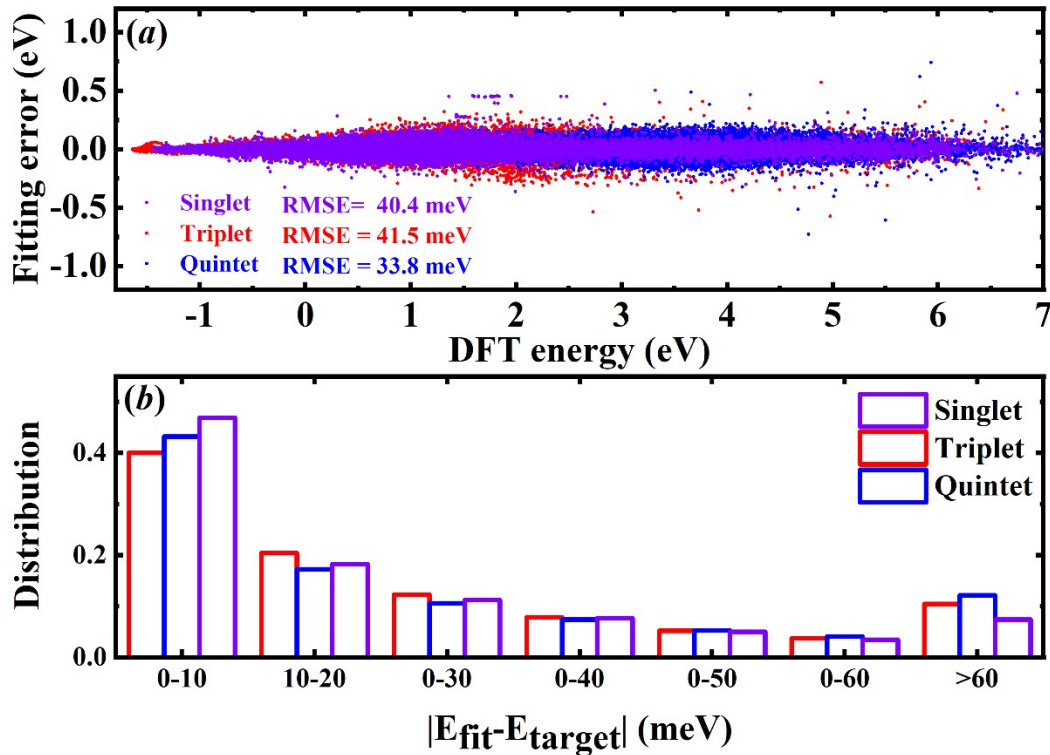



Figure S5. MEPs of the quintet state along (a) SP1, (b) SP2, (c) SP3, and (d) SP4.

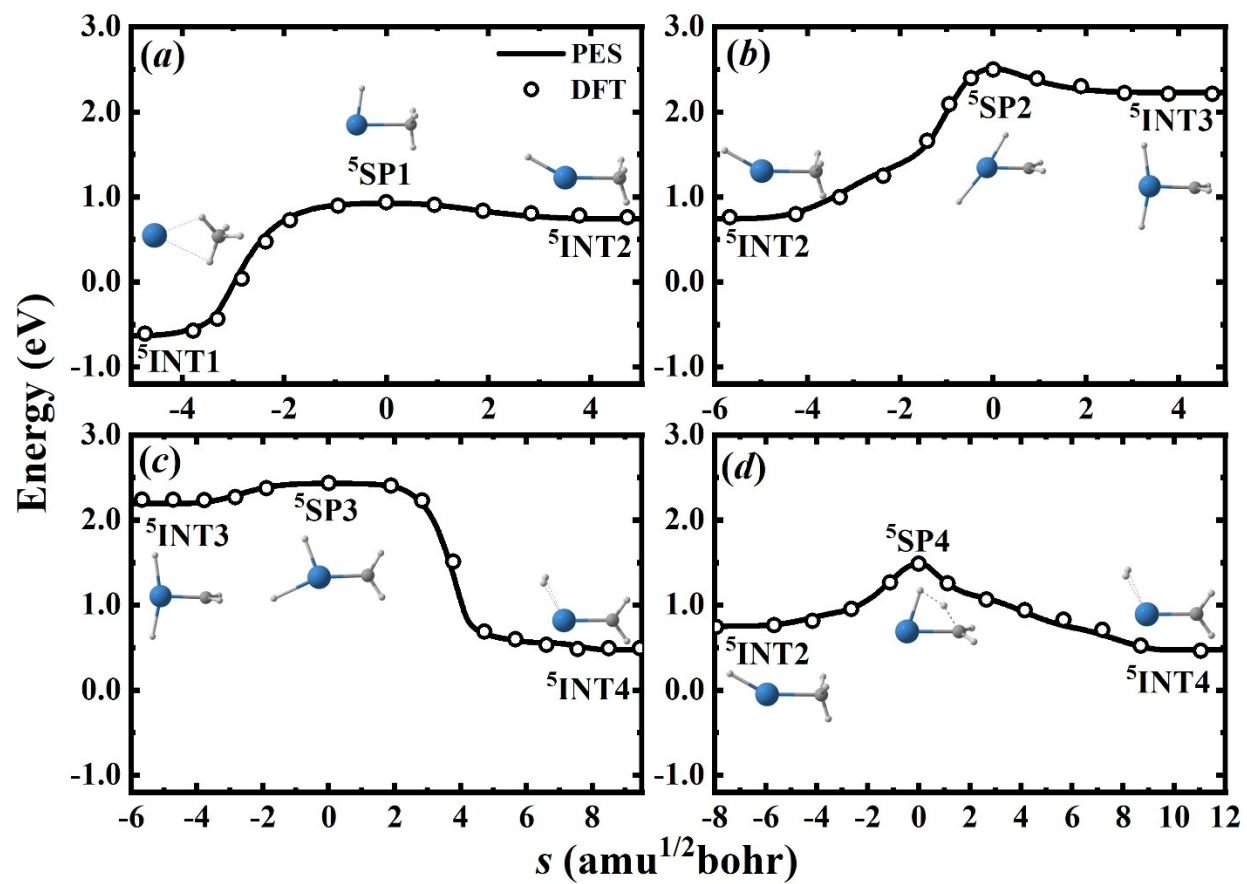

Figure S6. Similar to Figure S5 but for the triplet state.

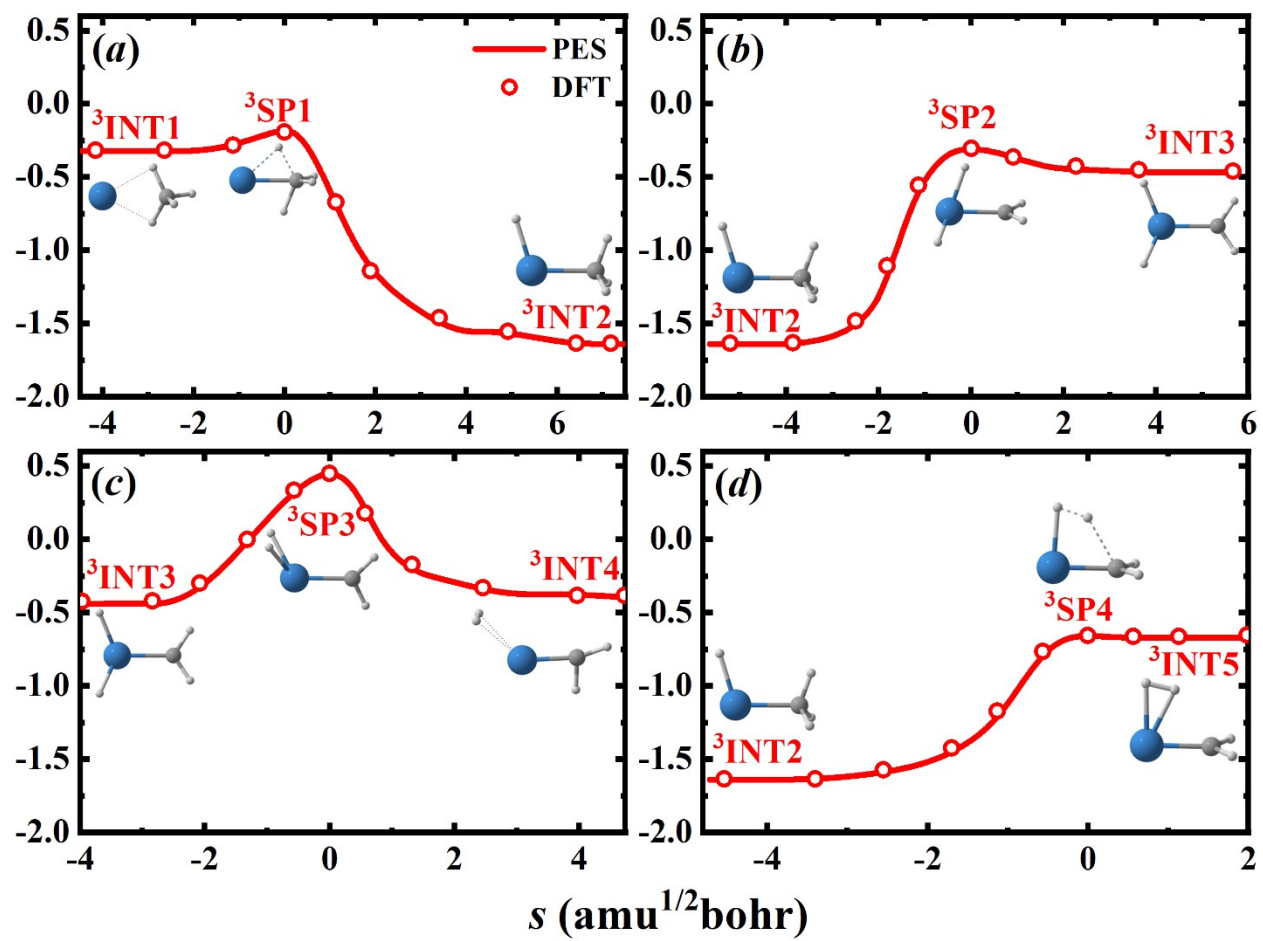

Figure S7. Similar to Figure S5 but for the singlet state.

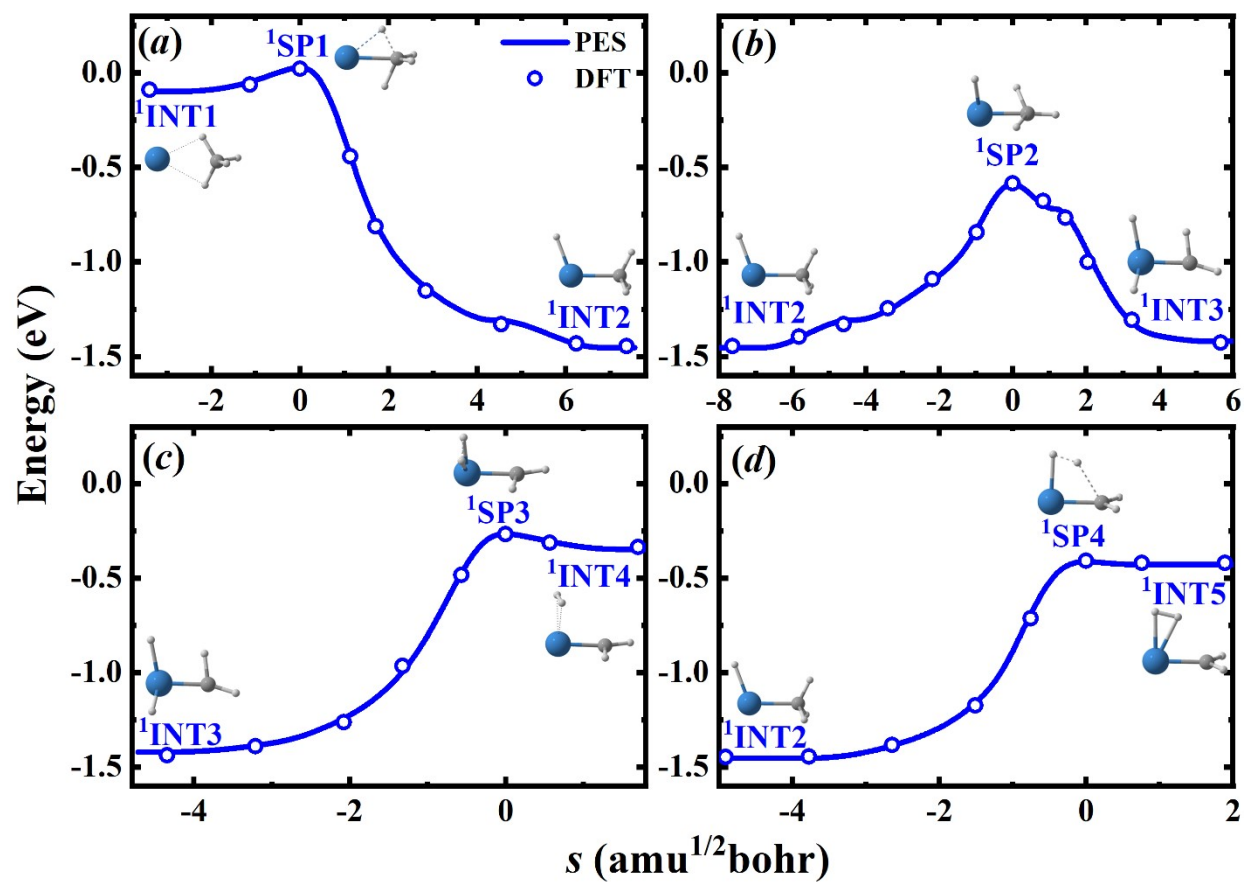

Figure S8. Comparison of geometries in internal coordinates (distances in Å and angles in degrees) for the MECP and  $^3\text{SP1}$  at the B3LYP/DZ level.

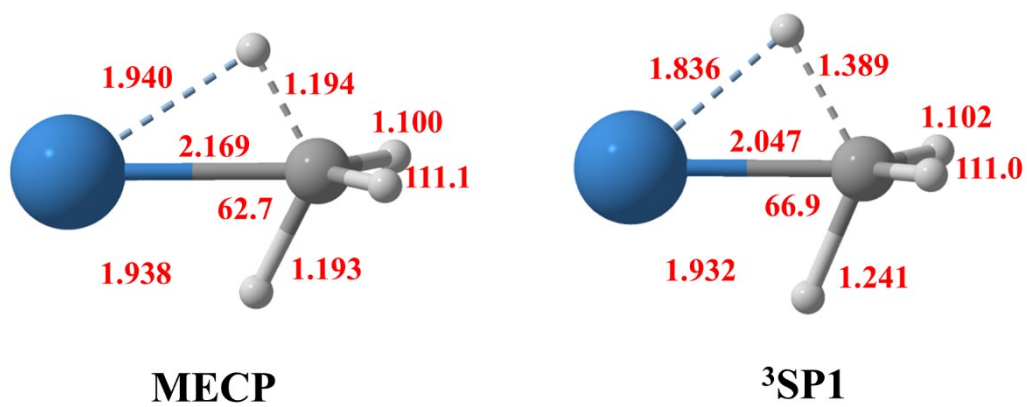

Figure S9. Correlation diagrams between the impact parameter and the scattering angle at different collision energies.

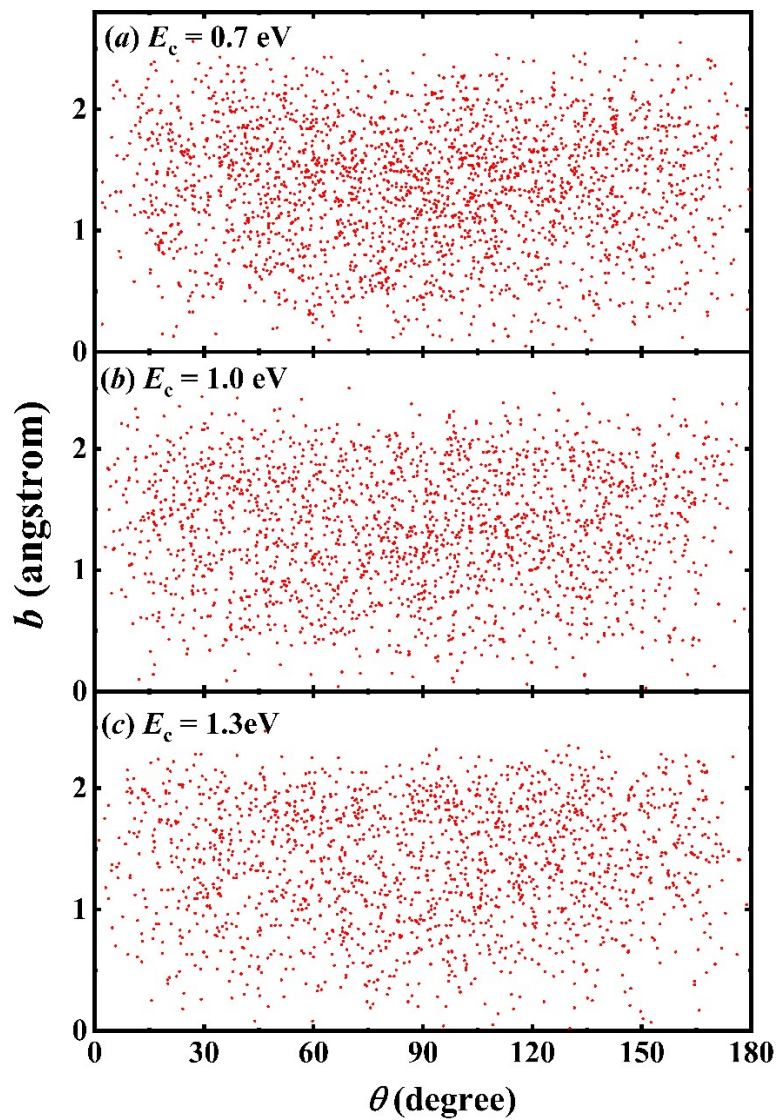

Figure S10. (a) Experimental velocity distributions of the  $\text{TaCD}_2^+$  product ion at  $E_c = 1.2$  eV. (b) Similar to (a) but for theoretical data. (c) Comparison of experimental integrated angular distributions between  $\text{Ta}^+ + \text{CD}_4$  reaction at  $E_c = 1.2$  eV and  $\text{Ta}^+ + \text{CH}_4$  reaction at  $E_c = 1.3$  eV. (d) Similar to (d) but for theoretical data. (e) Comparison of experimental distribution of the internal energy between  $\text{Ta}^+ + \text{CD}_4$  reaction at  $E_c = 1.2$  eV and  $\text{Ta}^+ + \text{CH}_4$  reaction at  $E_c = 1.3$  eV. (f) Similar to (e) but for theoretical data.

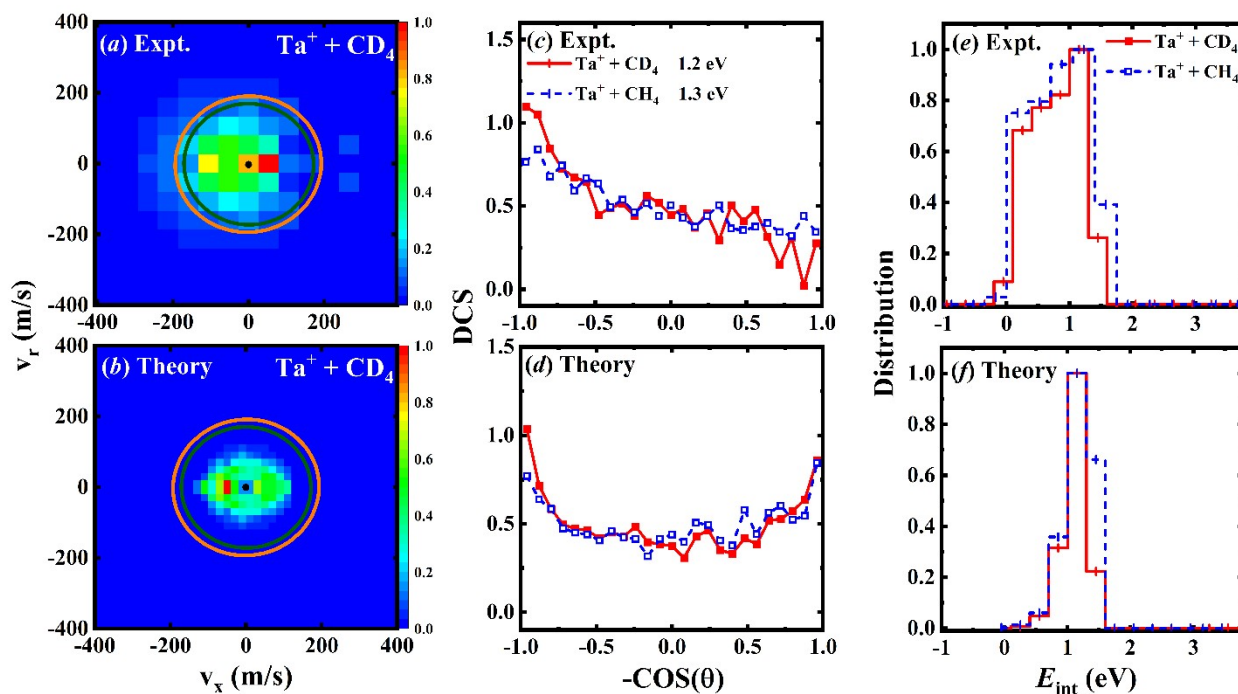

Figure S11. Spin-orbital couplings between quintet and triplet states at seven selected points along the minimum energy path.

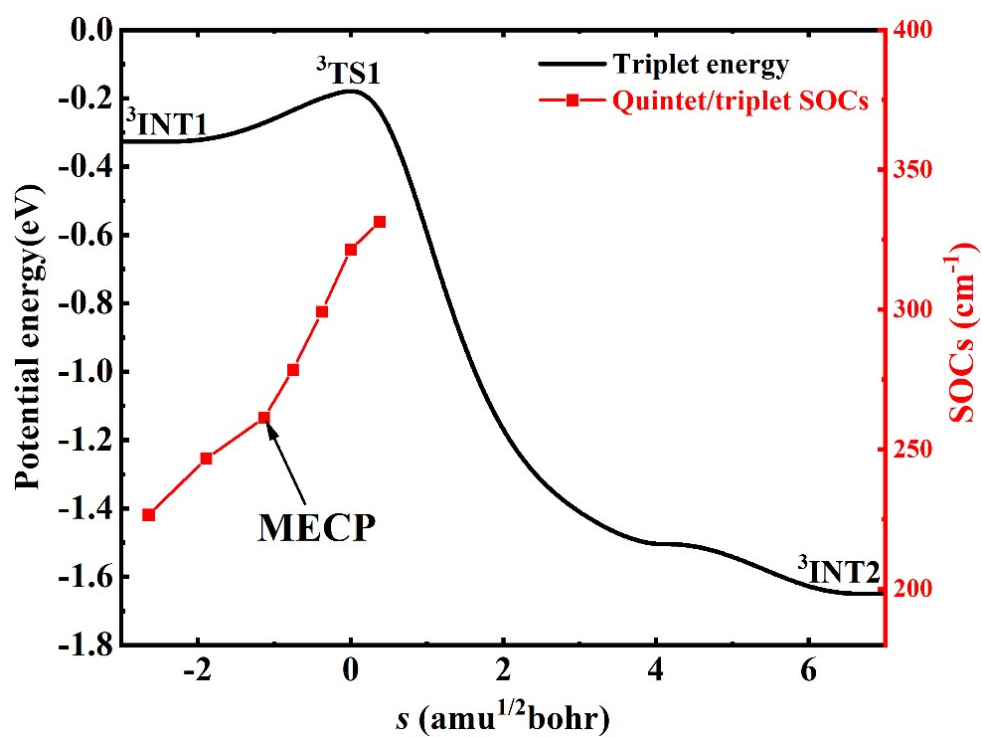

Figure S12. 1D cuts for the interaction potential energy surface between  $\text{Ta}^+$  and  $\text{CH}_4$  (top panels) and between  $\text{TaCH}_2^+$  and  $\text{H}_2$  (lower panels) with other coordinates fixed at their equilibrium values.

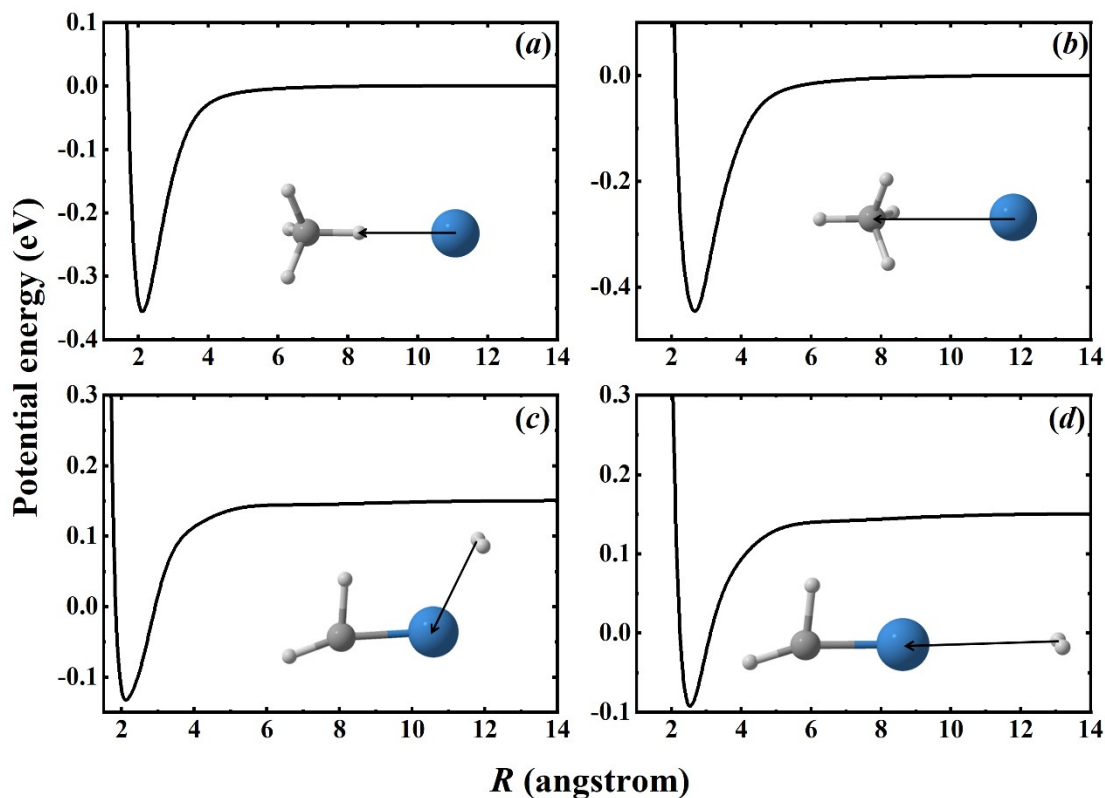



References:

1. L. G. Parke, C. S. Hinton and P. B. Armentrout, *J. Phys. Chem. C*, 2007, **111**, 17773-17787.
2. M. Meta, M. E. Huber, M. Birk, M. Wedele, M. Ončák and J. Meyer, *Faraday Disc.*, 2024, **251**, 587-603.
3. A. Kramida, Y. Ralchenko and J. Reader, NIST Atomic Spectra Database (ver. 5.8), Available: <https://physics.nist.gov/asd>. 2020.
